# Supplementary material
Source: HighWire-hosted journal article supplement (https://bmjopen.bmj.com/content/12/6/e051377)
Supplement: inline-supplementary-material-1 [file inline-supplementary-material-1.pdf]

**Supplementary Figure 1: A draft literature search for MEDLINE (the key words search string)****MEDLINE Search Strategy**

|              |                                                                                                                                                                                                                                                                                                                                                                                                                                                                                                                                                                                                                                                                                                                                                    |
|--------------|----------------------------------------------------------------------------------------------------------------------------------------------------------------------------------------------------------------------------------------------------------------------------------------------------------------------------------------------------------------------------------------------------------------------------------------------------------------------------------------------------------------------------------------------------------------------------------------------------------------------------------------------------------------------------------------------------------------------------------------------------|
| Population   | <i>(senior* OR elderly OR aged OR old OR age OR "older adult" OR older OR 65 years)</i>                                                                                                                                                                                                                                                                                                                                                                                                                                                                                                                                                                                                                                                            |
| Intervention | <i>(technology OR telemedicine OR telehealth OR "communication technology" OR ICT OR "electronic health" OR eHealth OR internet OR online OR tablet OR ipad OR web OR "world wide web" OR email OR website OR "web-based" OR "website delivered" OR PDA OR "mobile health" OR mHealth OR "mobile phone" OR "short messaging service" OR "multimedia messaging service" OR SMS OR "multimedia messaging service" OR MMS OR "text message" OR app OR smartphone OR "cell phone" OR "cellular phone" OR "picture message" OR tracker OR wearable* OR "digital health" OR "Information technology" OR fitbit OR garmin OR jawbone OR fuelband OR pedometer OR "step counter" OR sensors OR exergame* OR nintendo OR wii fit OR wii-fit OR wii fit)</i> |
| Setting      | <i>(community dwelling OR community-dwelling OR community dweller* OR community-dweller*)</i>                                                                                                                                                                                                                                                                                                                                                                                                                                                                                                                                                                                                                                                      |
| Outcome      | <i>(accidental falls OR falls OR faller OR fall* OR tripping OR balance OR mobility)</i>                                                                                                                                                                                                                                                                                                                                                                                                                                                                                                                                                                                                                                                           |
